# Supplementary material
Source: PubMed Central journal article supplement (PMC8092580)
Supplement: pnas.2101818118.sapp.pdf [file pnas.2101818118.sapp.pdf]

## SUPPLEMENTAL FIGURES AND TABLE LEGENDS

### Figure S1. Neuropeptide imaging of LNV neurons in intact living brains with Dilp2-GFP.

A. i. Dilp2-GFP images of s-LNV terminal projections into the dorsal protocerebrum (Z-projection stack) at ZT 2 and ZT 18. Scale bar = 25  $\mu\text{m}$ . ii. Quantification of neuropeptide content from s-LNV terminals. n = for time points ZT 1, 3, 10, 18, 22, 23 are 10, 22, 5, 7, 7, 7, respectively.

B. i. Dilp2-GFP images of s-LNV somas at ZT2 and ZT23. Scale bar = 10  $\mu\text{m}$ . ii. Quantification of neuropeptide content from s-LNV somata. n = for time points ZT 1, 3, 10, 18, 22, 23 are 18, 11, 10, 13, 17, 14, respectively.

C. i. I-LNV terminal neuropeptide content assessed at 6 time points in a 24-hour period in flies that were entrained 12h light:12h dark. n = for time points ZT 1, 3, 10, 18, 22, 23 are 13, 9, 8, 7, 10, 8, respectively.

ii. I-LNV somatic neuropeptide content assessed at 6 time points over 24 hours in flies that were entrained 12h light:12h dark. n = for time points ZT 1, 3, 10, 18, 22, 23 are 12, 13, 6, 9, 9, 10, respectively.

### Fig. S2. Neuropeptide release from I-LNV terminals.

A. Dilp2-FAP (FAP) in I-LNV nerve terminals reveals peptide release. Excised brains started in 0  $\text{Ca}^{2+}$ . After 8 min the bath was exchanged with  $\text{Ca}^{2+}$  containing saline (+Ca) to measure the effect of intrinsic activity. Note that +Ca increases the FAP signal within 4 min. Bar, 5  $\mu\text{m}$ . Dashed yellow outlines show regions of interest (ROIs). B. FAP quantification comparing 0 Ca (n = 4), +Ca (n = 3) and depolarization with high  $\text{K}^+$  in the

presence of  $\text{Ca}^{2+}$  (Hi K) (n = 3).

**Fig. S3. Tetanus Toxin (TetTx) attenuates neuropeptide release from LNV somas.**

A. Release from UAS-*Dilp2-FAP*; UAS-*TetTx*, *Pdf-Gal4* s-LNV somas at ZT23 (n = 12) was 69% less than UAS-*Dilp2-FAP*; UAS-*TetTx<sup>in</sup>*, *Pdf-Gal4*, controls (n = 8) expressing inactive mutant toxin. \*\*\*p < 0.001, unpaired t test.

B. Release from I-LNV somas at ZT23 expressing tetanus toxin (n = 22) was 44% less than controls (n = 14) expressing inactive mutant toxin. \*p < 0.05, unpaired t test.

C. Release from UAS-*Dilp2-FAP*; UAS-*TetTx*, *Pdf-Gal4*, s-LNV terminals at ZT3 expressing tetanus toxin (n = 9) was 82% less than UAS-*Dilp2-FAP*; UAS-*TetTx<sup>in</sup>*, *Pdf-Gal4*, controls (n = 4) expressing inactive mutant toxin. \*\*\*p < 0.001, unpaired t test.

D. Release from I-LNV terminals at ZT23 expressing tetanus toxin (n = 22) was not significantly different from controls (n = 14) expressing inactive mutant toxin.

**Supplemental Table. 1. Rhythmic Locomotor Activity in days DD2-DD8 for flies expressing  $\text{IP}_3$  sponge to alter neuropeptide release.**

Chi-squared period testing range was 18-30h, resolution was 0.2h, and threshold for filtering arrhythmic flies was set at a rhythm strength of 1, thus any flies below this threshold were not considered rhythmic and did not contribute to the calculation of period. n = # of flies; N = # of experiments; AR% = % of arrhythmic flies; Tau = period of rhythmic flies.

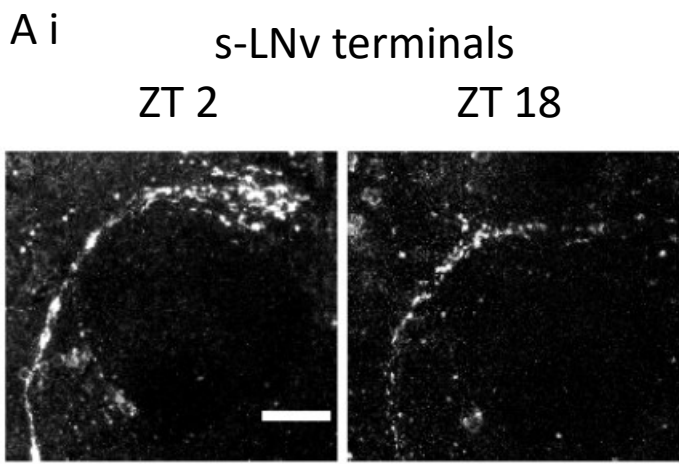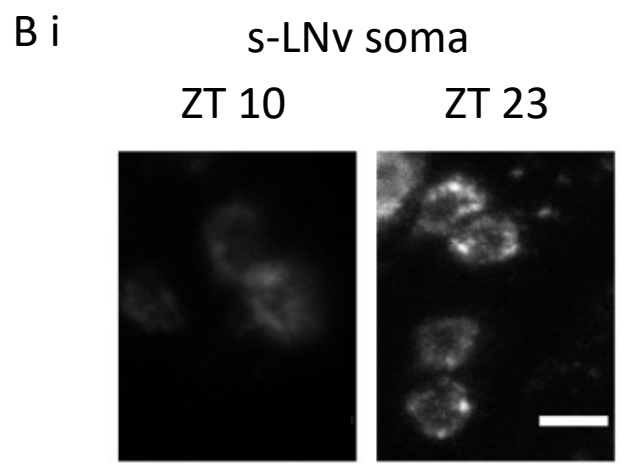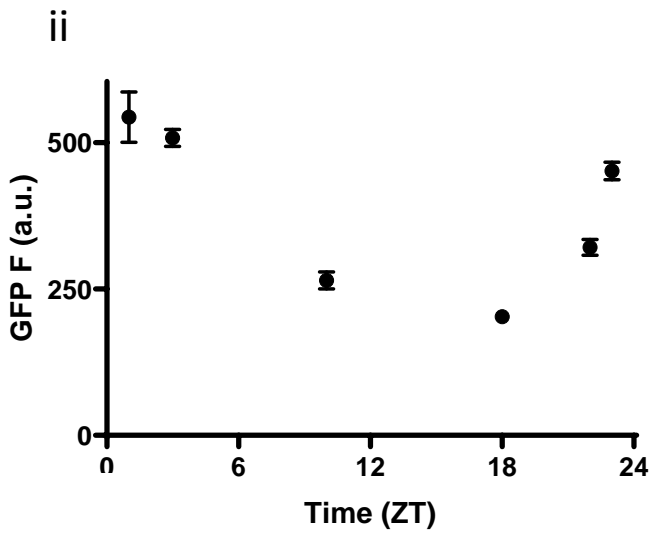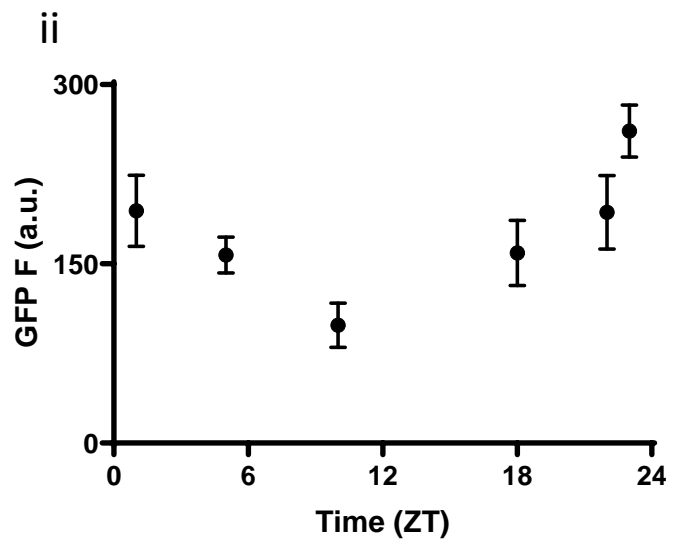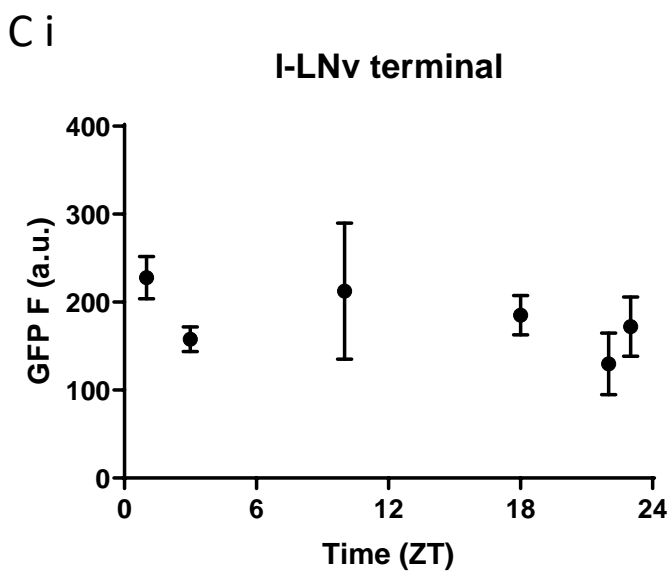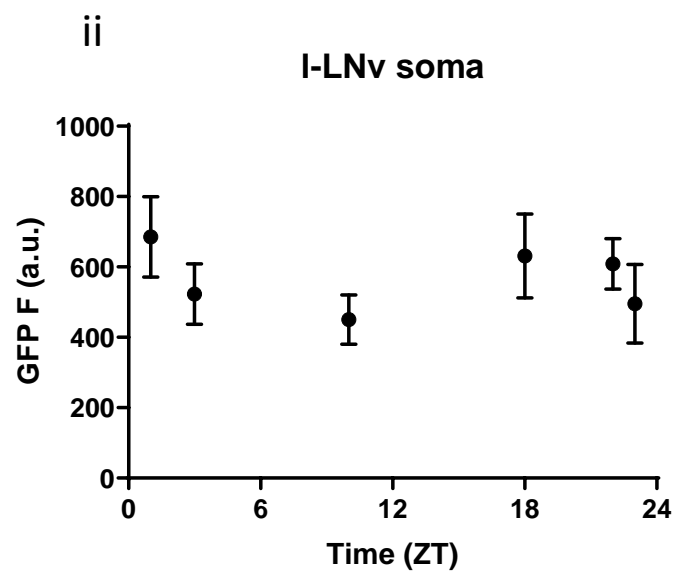

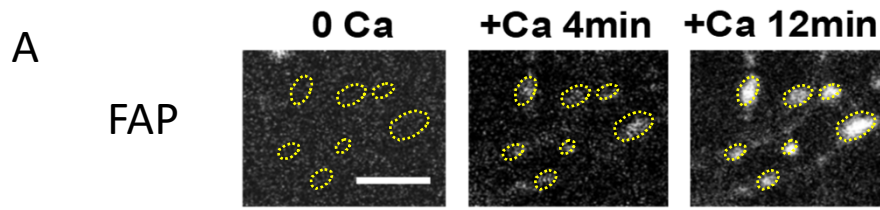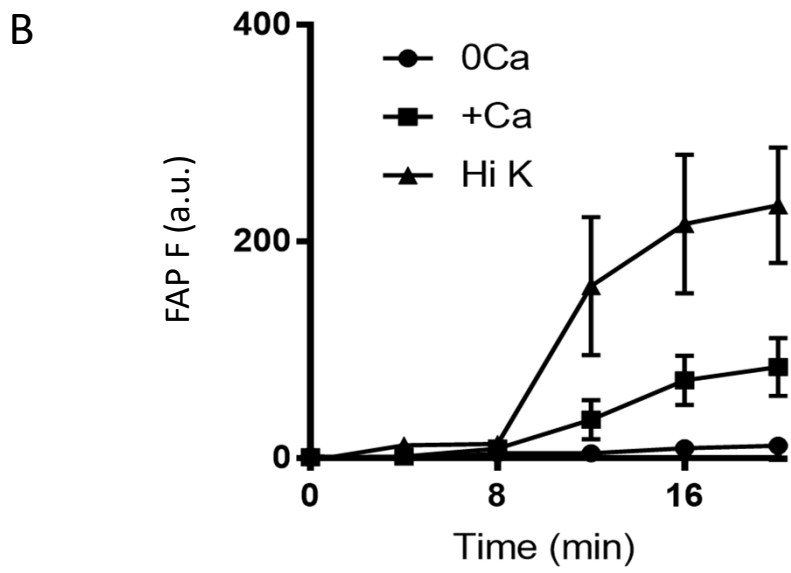

Supplemental Figure 2

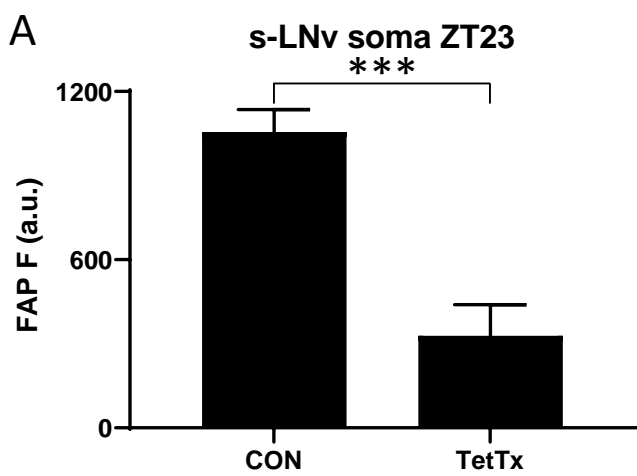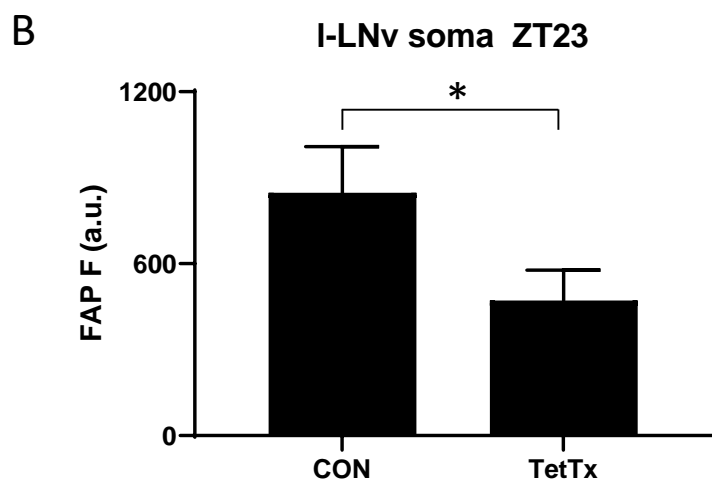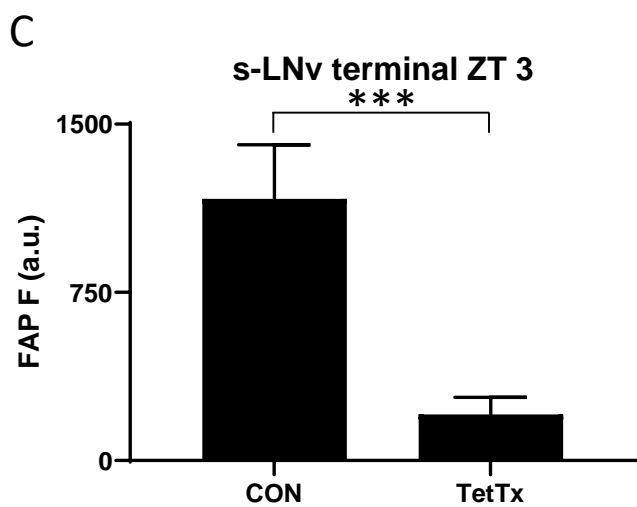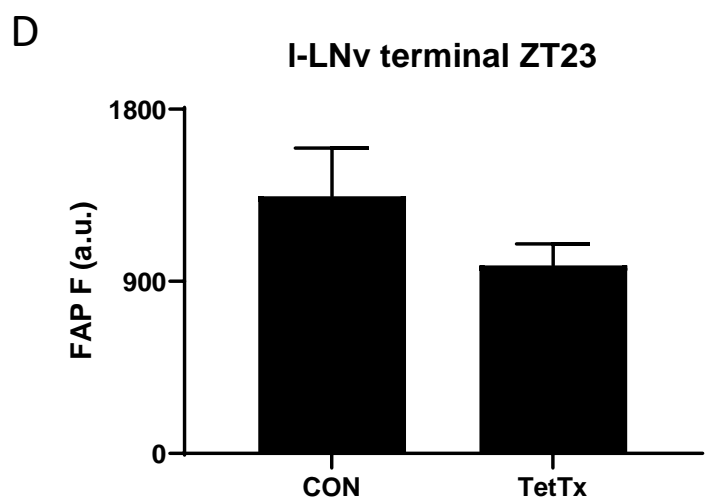

|                                  | n   | N | TAU   | SEM  | %AR | Rhythm strength | SEM  |
|----------------------------------|-----|---|-------|------|-----|-----------------|------|
| UAS-IP3 sponge                   | 120 | 5 | 23.71 | 0.23 | 7   | 1.35            | 0.04 |
| UAS-FAP; Pdf>                    | 107 | 5 | 24.08 | 0.16 | 19  | 1.34            | 0.03 |
| UAS-FAP; Pdf><br>/UAS-IP3 sponge | 120 | 5 | 24.06 | 0.14 | 50  | 1.11            | 0.01 |

Table S1
